# Supplementary material for: Acute post-stroke blood pressure relative to premorbid levels in intracerebral haemorrhage versus major ischaemic stroke: a population-based study
Source: PubMed Central journal article supplement (PMC4238109; doi:10.1016/s1474-4422(14)70031-6), 2014-04
Supplement: mmc1.pdf [file mmc1.pdf]

# THE LANCET **Neurology**

## **Supplementary webappendix**

This webappendix formed part of the original submission and has been peer reviewed. We post it as supplied by the authors.

Supplement to: Fischer U, Cooney MT, Bull LM, et al. Acute post-stroke blood pressure relative to premorbid levels in intracerebral haemorrhage versus major ischaemic stroke: a population-based study. *Lancet Neurol* 2014; published online Feb 28. [http://dx.doi.org/10.1016/S1474-4422\(14\)70031-6](http://dx.doi.org/10.1016/S1474-4422(14)70031-6).

## **Webappendix**

### **P1. Supplemental methods of case ascertainment: hot and cold pursuit**

Hot pursuit was based on the daily assessment of all patients with a possible vascular event identified by: 1) Daily searches of Emergency Department admission and symptom/diagnosis registers; 2) Daily listing from the central admissions department of all patients from our general practices admitted to hospital, and assessment of these patients in hospital; 3) Daily visits to all acute medical wards and stroke unit; 4) Provision of daily study TIA and stroke clinic for participating primary care practices and review of all referrals to other similar clinics; 5) Daily identification via Bereavement Officers of patients dead on arrival at hospital or who died soon after; 6) Daily assessment of all patients undergoing diagnostic angiographic, angioplasty/stenting procedures.

The methods of cold pursuit were: 1) Frequent contact with general practices and monthly searches of computerised practice diagnostic codes; 2) Monthly practice-specific list of all patients with relevant diagnostic codes from the coding departments covering all acute and community hospitals (Hospital Episode Statistics – HES – data); 3) Monthly searches of all requests for brain and carotid imaging; 4) Monthly visits to the Coroner's Office to review out-of-hospital deaths; 5) Review of all death certificates and relevant clinical details in the study practices; 6) Practice-specific listings of all ICD-10 death codes from the local Department of Public Health;

P2. The distribution of stroke severity (NIHSS scores) at the time of first assessment in patients with intracerebral haemorrhage versus ischaemic stroke.

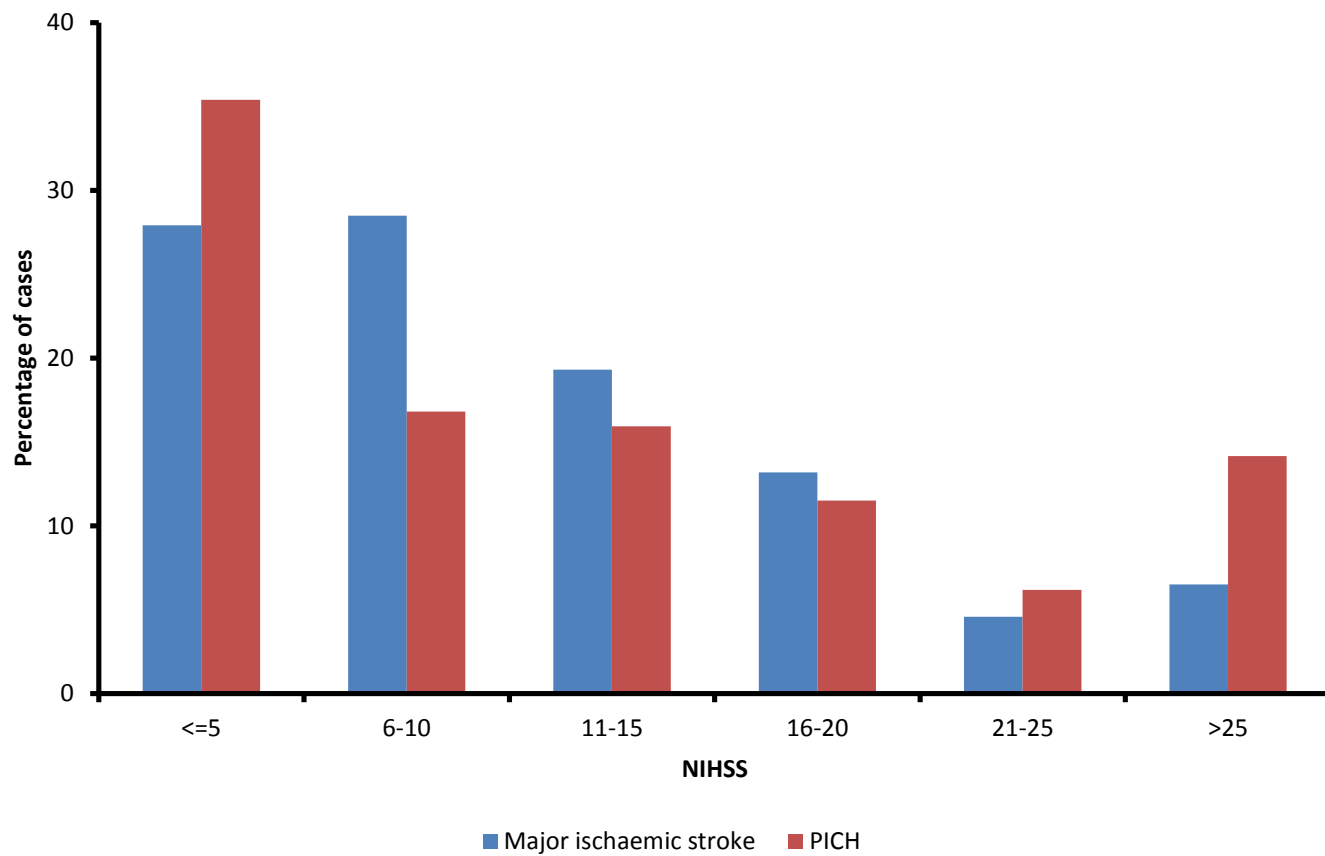

P3. The distribution of time from most recent pre-morbid BP reading and stroke onset in patients with P ICH and ischaemic stroke.

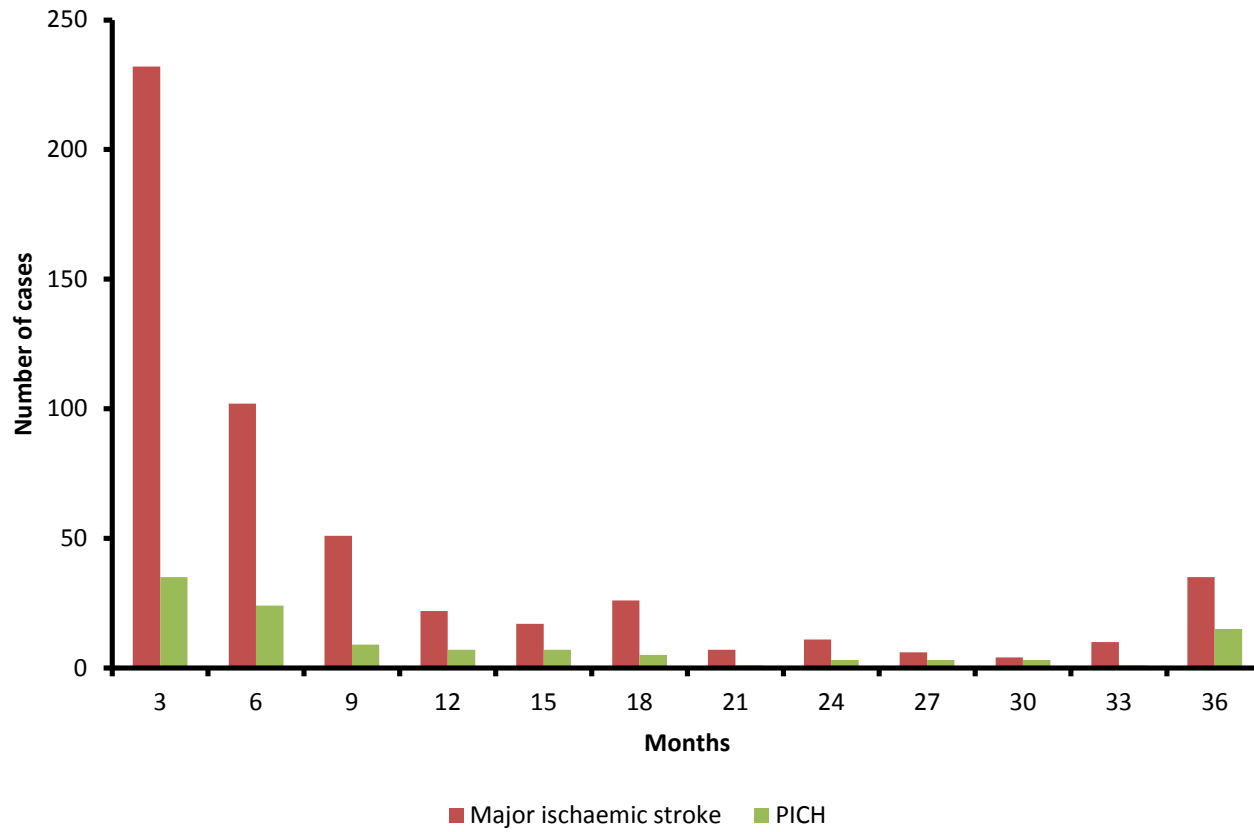

P4. The association between the number of pre-morbid BP readings and the mean pre-morbid SBP for patients with ICH versus ischaemic stroke. The trend lines and equations are derived from linear regression analyses.

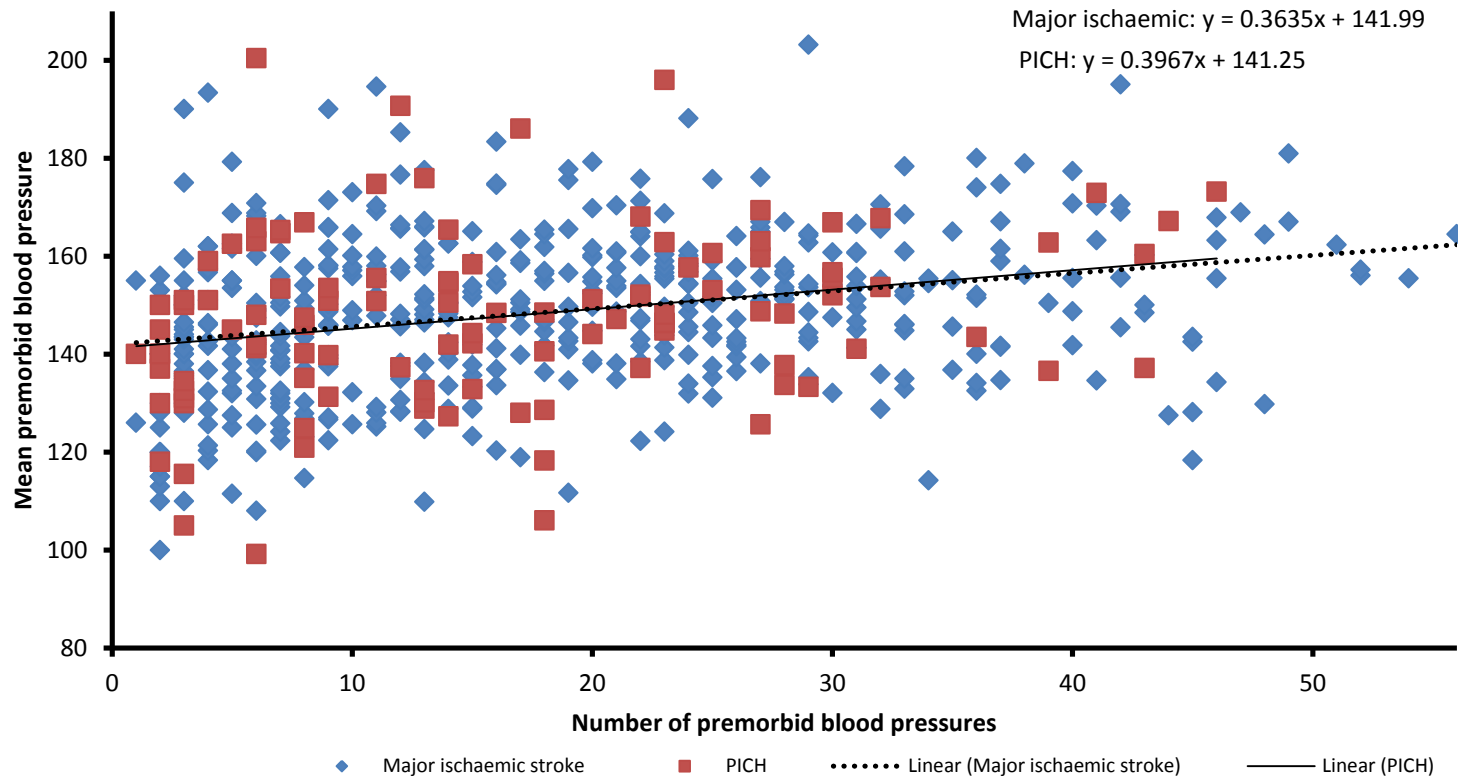

**P5. Post event and pre-morbid SBPs in stroke patients assessed 3 hours or more after stroke onset.**

|                           | Patients assessed 3 hours or more after stroke |                   |                        |                       |                  |
|---------------------------|------------------------------------------------|-------------------|------------------------|-----------------------|------------------|
|                           | N                                              | Maximum premorbid | 10 year mean premorbid | Most recent premorbid | First post event |
| Major ischaemic stroke    | 229                                            | 182.5 (30.7)      | 141.0 (22.2)           | 149.4 (16.5)          | 157.6 (31.0)     |
| Intracerebral haemorrhage | 45                                             | 169.5 (28.3)      | 140.4 (21.1)           | 145.6 (17.4)          | 172.2 (34.0)     |
| ICH LOCATION              |                                                |                   |                        |                       |                  |
| Lobar                     | 19                                             | 165.8 (28.6)      | 145.4 (17.1)           | 140.3 (17.9)          | 169.2 (37.2)     |
| Deep/Posterior            | 26                                             | 172.2 (28.3)      | 145.7 (17.9)           | 140.4 (23.5)          | 174.5 (32.1)     |
| TOAST                     |                                                |                   |                        |                       |                  |
| Cardioembolic             | 79                                             | 187.8 (30.3)      | 149.2 (16.3)           | 136.6 (21.7)          | 158.1 (32.5)     |
| Large artery              | 11                                             | 186.7 (28.6)      | 155.2 (17.4)           | 157.4 (30.8)          | 175.9 (29.5)     |
| Small vessel              | 34                                             | 177.8 (29.4)      | 149.3 (18.3)           | 147.2 (21.7)          | 167.8 (24.6)     |
| Undetermined              | 37                                             | 183.7 (29.2)      | 150.7 (17.4)           | 142.6 (17.7)          | 163.3 (27.0)     |
| Unknown                   | 56                                             | 176.6 (33.6)      | 148.0 (16.1)           | 138.1 (22.9)          | 144.8 (32.9)     |
| Multiple causes           | 7                                              | 186.6 (25.2)      | 148.4 (11.1)           | 146.3 (24.7)          | 144.9 (17.6)     |
| Other known cause         | 5                                              | 175.8 (34.5)      | 148.5 (16.4)           | 143.0 (11.9)          | 158.2 (24.5)     |

P6. Sensitivity analyses differences between ICH and major ischaemic stroke in the first post-event SBP and in the first post-event \sbp minus the most recent pre-event SBP in: 1. All patients excluding those with wake-up strokes; 2. Patients with two pre-morbid SBP in last year and first post-event SBP within 6 hours of stroke onset.

1. Analyses in patients excluding wake-up strokes

|                      |                        | N   | Mean    | Std. Deviation | p-difference |
|----------------------|------------------------|-----|---------|----------------|--------------|
| First post Systolic  | Major ischaemic stroke | 377 | 157.87  | 30.678         | <0.0001      |
|                      | ICH                    | 103 | 183.20  | 37.747         |              |
| Post - minus pre SBP | Major ischaemic stroke | 377 | 16.1061 | 32.47101       | <0.0001      |
|                      | ICH                    | 103 | 38.1553 | 37.81969       |              |

2. Analyses confined to patients with two pre-morbid SBP in last year and first post-event SBP within 6 hours of stroke onset

|                       |                        | N   | Mean    | Std. Deviation | p-difference |
|-----------------------|------------------------|-----|---------|----------------|--------------|
| Closest post Systolic | Major ischaemic stroke | 273 | 160.31  | 30.513         | 0.001        |
|                       | ICH                    | 58  | 178.31  | 36.235         |              |
| Post minus pre SBP    | Major ischaemic stroke | 273 | 21.3187 | 30.11493       | 0.003        |
|                       | ICH                    | 58  | 35.8966 | 33.23953       |              |

P7. The number and timing of all BP measurements during the first 24-hours post-stroke in the subset of patients with a first measurement within 90-minutes of stroke onset.

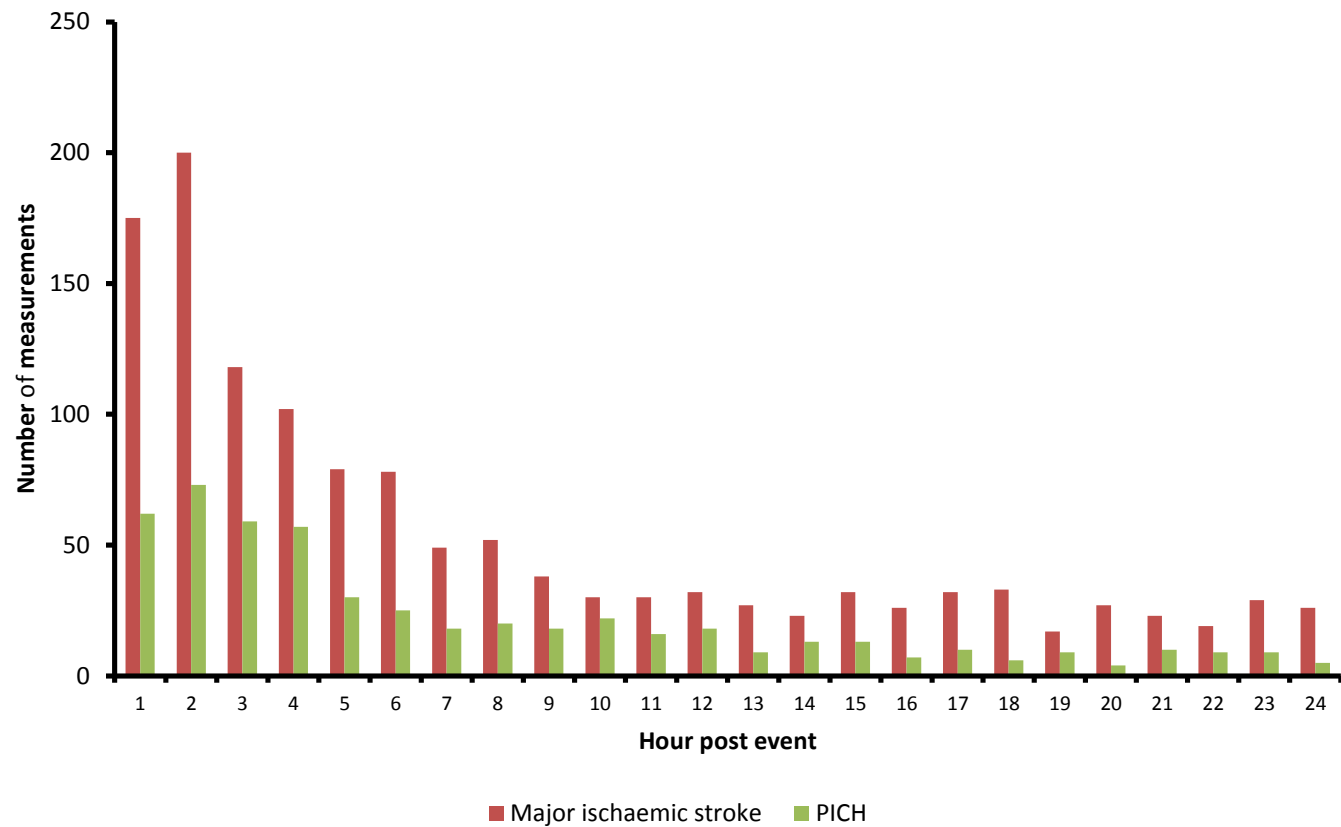



P8. Acute post event SBP and premorbid values in major ischaemic stroke and ICH patients, subdivided by pre-morbid use of antihypertensive drugs.

|                                  | Patients assessed <3 hours from stroke onset |                   |                        |                       |                  | All patients |                   |                        |                       |                  |
|----------------------------------|----------------------------------------------|-------------------|------------------------|-----------------------|------------------|--------------|-------------------|------------------------|-----------------------|------------------|
|                                  | N                                            | Maximum premorbid | 10 year mean premorbid | Most recent premorbid | First post event | N            | Maximum premorbid | 10 year mean premorbid | Most recent premorbid | First post event |
| <b>Not on antihypertensives:</b> |                                              |                   |                        |                       |                  |              |                   |                        |                       |                  |
| Major ischaemic stroke           | 92                                           | 163.4 (22.9)      | 143.9 (14.1)           | 138.1 (17.4)          | 159.2 (27.8)     | 171          | 164.2 (23.8)      | 143.8 (14.9)           | 137.9 (18.9)          | 158.8 (28.7)     |
| Intracerebral haemorrhage        | 29                                           | 167.0 (25.7)      | 142.6 (17.0)           | 144.2 (21.2)          | 193.4 (37.4)     | 59           | 163.0 (25.7)      | 141.9 (16.9)           | 142.5 (19.1)          | 181.7 (36.9)     |
| <b>On antihypertensives:</b>     |                                              |                   |                        |                       |                  |              |                   |                        |                       |                  |
| Major ischaemic stroke           | 202                                          | 187.1 (27.9)      | 149.5 (15.4)           | 141.7 (21.8)          | 158.2 (31.2)     | 352          | 189.0 (28.7)      | 150.7 (15.8)           | 142.1 (22.2)          | 157.7 (31.4)     |
| Intracerebral haemorrhage        | 39                                           | 185.7 (23.7)      | 153.5 (17.4)           | 147.9 (23.6)          | 187.1 (39.5)     | 54           | 187.0 (23.0)      | 153.6 (16.7)           | 145.6 (24.9)          | 184.1 (38.7)     |

**P9.** Repeated SBP measurements in patients assessed within 90 minutes of stroke onset. Time is hours from stroke onset. The red line and associated equations are derived from linear regression.

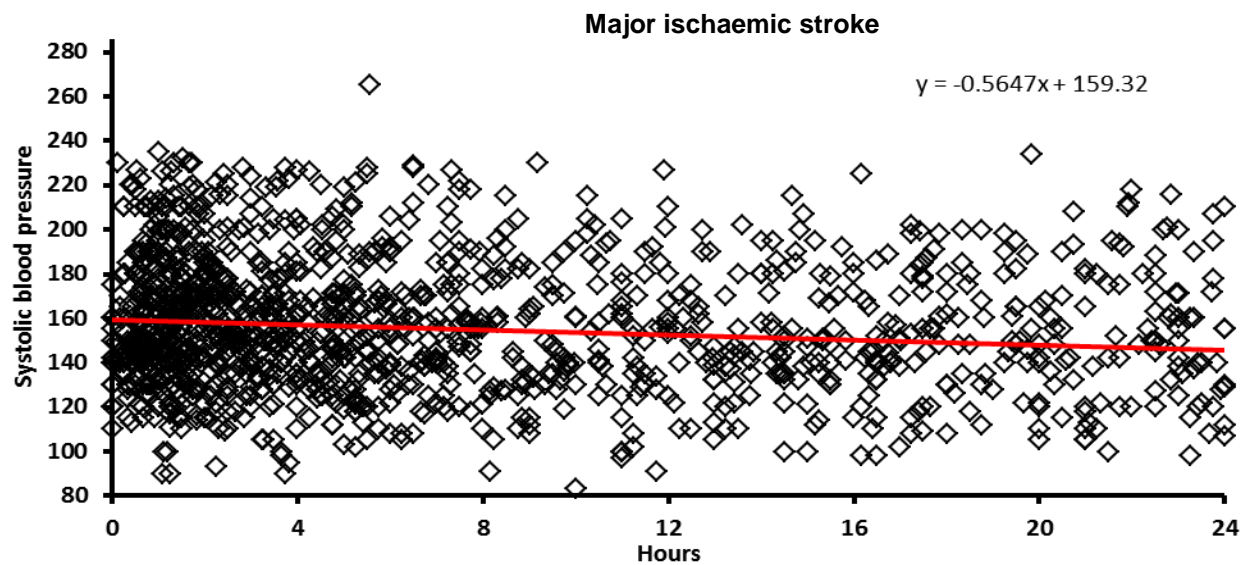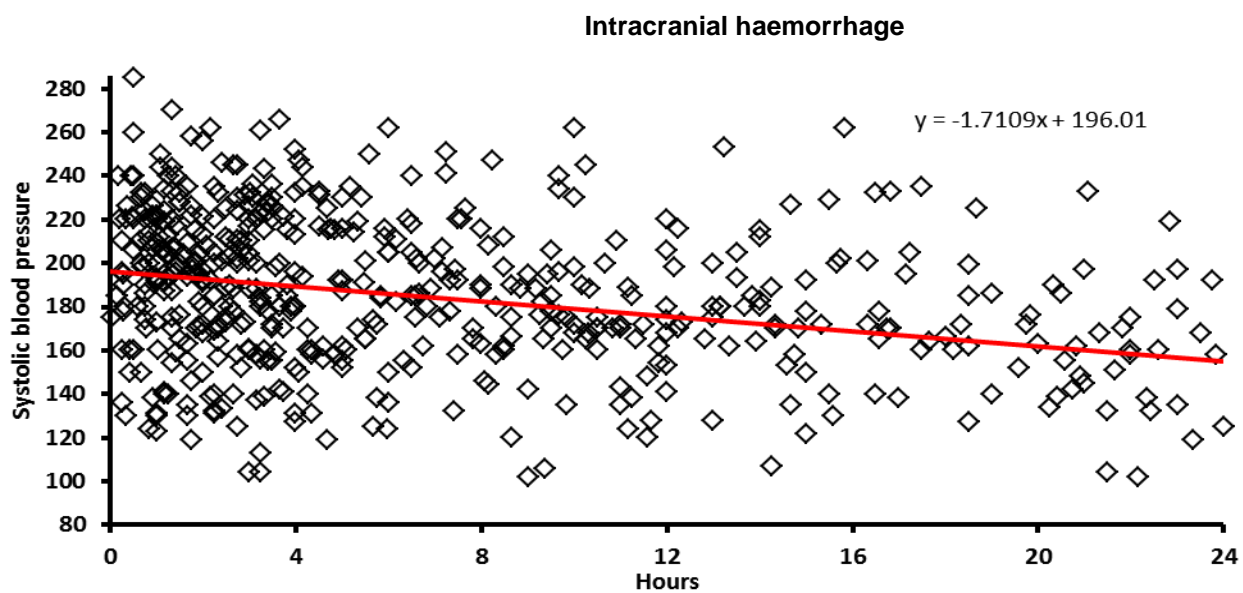

**P10. Baseline characteristics of patients with major ischaemic stroke and ICH: OCSP population**

| Characteristics                      | Major ischaemic stroke | Intracerebral haemorrhage |
|--------------------------------------|------------------------|---------------------------|
|                                      | n = 181                | n = 38                    |
| Age (mean)                           | 77.0                   | 72.4                      |
| Female sex                           | 106 (59%)              | 22 (58%)                  |
| Vascular risk factors                |                        |                           |
| Hypertension                         | 91 (51%)               | 22 (58%)                  |
| Diabetes mellitus                    | 22 (12%)               | 0                         |
| Smoking                              |                        |                           |
| Never smoked                         | 65 (38%)               | 14 (40%)                  |
| Ex-Smoker                            | 45 (26%)               | 7 (20%)                   |
| Current Smoker                       | 63 (36%)               | 14 (40%)                  |
| Previous atrial fibrillation         | 31 (17%)               | 5 (14%)                   |
| Previous myocardial infarction       | 36 (20%)               | 4 (11%)                   |
| Previous angina                      | 30 (17%)               | 2 (5%)                    |
| Previous transient ischaemic attack  | 28 (15%)               | 3 (8%)                    |
| Previous peripheral vascular disease | 23 (13%)               | 1 (3%)                    |
| Medication                           |                        |                           |
| Prior antihypertensives              | 41 (30%)               | 3 (8%)                    |
| Prior antiplatelet                   | 6 (3%)                 | 3 (8%)                    |
| Type of event                        |                        |                           |
| Incident event                       | 100%                   | 100%                      |
| Recurrent event                      | 0%                     | 0%                        |
